# Supplementary material
Source: PubMed Central journal article supplement (PMC3268303)
Supplement: 1120385109_pnas.201120385SI.pdf [file 1120385109_pnas.201120385SI.pdf]

# Supporting Information

Abud et al. 10.1073/pnas.1120385109

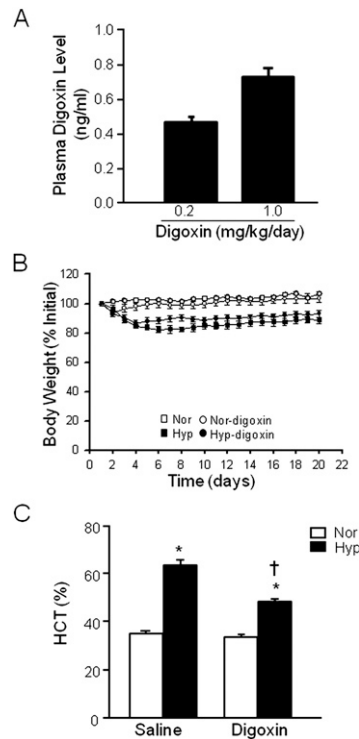

**Fig. S1.** Plasma digoxin levels and effect of digoxin treatment on body weight and hematocrit (HCT). (A) Plasma digoxin levels (mean  $\pm$  SEM) in mice treated by i.p. injection of digoxin ( $n = 6$  each). (B) Change in body weight (mean  $\pm$  SEM) during normoxic (Nor; 21% O<sub>2</sub>) and hypoxic (Hyp; 10% O<sub>2</sub>) exposure, expressed as percentage of initial weight (day 1), in mice injected with saline or digoxin (1.0 mg/kg per day).  $n = 11$  for Nor-saline,  $n = 13$  for Hyp-saline, and  $n = 9$  for Nor- and Hyp-digoxin. (C) Hematocrit (mean  $\pm$  SEM) in normoxic and hypoxic mice treated with saline or digoxin (1.0 mg/kg per day).  $n = 8$  for Nor-saline and Hyp-saline,  $n = 9$  for Nor-digoxin and Hyp-digoxin. \*Significantly different ( $P < 0.05$ ) from normoxia value within treatment; †significantly different ( $P < 0.05$ ) from Hyp-saline.

**Table S1. Effect of hypoxia on right ventricle (RV) and left ventricle (LV) weights**

| Treatment           | RV weight (mg)              | LV weight (mg) | BW (g)          | RV/BW (mg/g)                 | LV/BW (mg/g)   | HR (beats/min) |
|---------------------|-----------------------------|----------------|-----------------|------------------------------|----------------|----------------|
| Normoxia-prevention |                             |                |                 |                              |                |                |
| Saline              | 20.7 $\pm$ 0.7              | 89.5 $\pm$ 3.3 | 28.8 $\pm$ 0.9  | 0.72 $\pm$ 0.01              | 3.1 $\pm$ 0.04 | 393 $\pm$ 46   |
| Digoxin (1.0 mg/kg) | 17.2 $\pm$ 0.5              | 76.0 $\pm$ 2.2 | 24.9 $\pm$ 0.6  | 0.70 $\pm$ 0.02              | 3.1 $\pm$ 0.03 | 383 $\pm$ 19   |
| Hypoxia-prevention  |                             |                |                 |                              |                |                |
| Saline              | 32.2 $\pm$ 1.8*             | 81.9 $\pm$ 2.5 | 23.4 $\pm$ 0.5* | 1.4 $\pm$ 0.08*              | 3.4 $\pm$ 0.1  | 395 $\pm$ 17   |
| Digoxin (1.0 mg/kg) | 21.8 $\pm$ 0.9 <sup>†</sup> | 71.4 $\pm$ 1.9 | 23.9 $\pm$ 0.8  | 0.92 $\pm$ 0.05 <sup>†</sup> | 3.0 $\pm$ 0.06 | 364 $\pm$ 18   |
| Hypoxia-reversal    |                             |                |                 |                              |                |                |
| Saline              | 26.0 $\pm$ 1.0              | 79.3 $\pm$ 2.2 | 25.6 $\pm$ 0.6  | 1.0 $\pm$ 0.04               | 3.1 $\pm$ 0.05 | 420 $\pm$ 22   |
| Digoxin (0.2 mg/kg) | 22.0 $\pm$ 0.9 <sup>†</sup> | 75.2 $\pm$ 2.6 | 25.8 $\pm$ 0.8  | 0.85 $\pm$ 0.03 <sup>†</sup> | 2.9 $\pm$ 0.05 | 383 $\pm$ 18   |
| Digoxin (1.0 mg/kg) | 21.8 $\pm$ 0.6 <sup>†</sup> | 71.5 $\pm$ 2.9 | 23.7 $\pm$ 0.8  | 0.91 $\pm$ 0.03 <sup>†</sup> | 3.0 $\pm$ 0.1  | 370 $\pm$ 29   |

Data are presented as mean  $\pm$  SEM [ $n = 7$  for saline hypoxia-reversal and digoxin (0.2 mg/kg/d) hypoxia-reversal and  $n = 8$  for all other groups]. BW, body weight.

\*Significant difference ( $P < 0.05$ ) compared to normoxia value within a treatment (saline or digoxin).

<sup>†</sup>Significant difference ( $P < 0.05$ ) compared to saline value within an exposure (normoxia or hypoxia).
